# Supplementary material
Source: PubMed Central journal article supplement (PMC9630516)
Supplement: 41598_2022_21881_MOESM1_ESM.pdf [file 41598_2022_21881_MOESM1_ESM.pdf]

## Supplementary materials

### MENTAL HEALTH IN PREGNANT INDIVIDUALS DURING THE COVID-19 PANDEMIC BASED ON A SWISS ONLINE SURVEY

Guillaume Favre, Cléa Kunz, Simone Schwank, Ho-Fung Chung, Anda Petronela Radan, Luigi Raio,

Mihaela Fluri, Ursula Winterfeld, David Baud & Leo Pomar

Table S1: Baseline characteristics between participants without and with mental health impairment

|                                                    | Patient <b>without</b> mental health impairment<br>n = 464 |          |              | Patient <b>with</b> mental health impairment<br>n = 272 |          |              |
|----------------------------------------------------|------------------------------------------------------------|----------|--------------|---------------------------------------------------------|----------|--------------|
|                                                    | n                                                          | %        | IQR          | n                                                       | %        | IQR          |
| <b>Maternal age (years)</b>                        |                                                            |          |              |                                                         |          |              |
| - 18-25                                            | 12                                                         | 2.6      | 1.3 - 4.5    | 12                                                      | 4.4      | 2.3 - 7.6    |
| - 26-30                                            | 138                                                        | 29.7     | 25.6 - 34.1  | 81                                                      | 29.8     | 24.4 - 35.6  |
| - 31-35                                            | 216                                                        | 46.6     | 41.9 - 51.2  | 134                                                     | 49.3     | 43.2 - 55.4  |
| - 36-40                                            | 81                                                         | 17.5     | 14.1 - 21.2  | 36                                                      | 13.2     | 9.4 - 17.8   |
| - >40                                              | 17                                                         | 3.7      | 2.1 - 5.8    | 9                                                       | 3.3      | 1.5 - 6.2    |
| <b>Marital / Relationship status</b>               | <b>n</b>                                                   | <b>%</b> | <b>95%CI</b> | <b>n</b>                                                | <b>%</b> | <b>95%CI</b> |
| - Single                                           | 34                                                         | 7.3      | 5.1 - 10.1   | 23                                                      | 8.5      | 5.4 - 12.4   |
| - Married                                          | 280                                                        | 60.3     | 55.7 - 64.8  | 141                                                     | 51.8     | 45.7 - 57.9  |
| - Cohabitation                                     | 78                                                         | 16.8     | 13.5 - 20.5  | 60                                                      | 22.1     | 17.3 - 27.5  |
| - In relationship                                  | 70                                                         | 15.1     | 12.0 - 18.7  | 48                                                      | 17.6     | 13.3 - 22.7  |
| - Divorced                                         | 2                                                          | 0.4      | 0.1 - 1.5    | 0                                                       | 0.0      | 0.0 - 1.3    |
| <b>Nationality</b>                                 |                                                            |          |              |                                                         |          |              |
| - Swiss                                            | 349                                                        | 75.2     | 71.0 - 79.1  | 183                                                     | 67.3     | 61.4 - 72.8  |
| - French                                           | 72                                                         | 15.5     | 12.3 - 19.1  | 50                                                      | 18.4     | 14.0 - 23.5  |
| - Belgium                                          | 12                                                         | 2.6      | 1.3 - 4.5    | 19                                                      | 7.0      | 4.3 - 10.7   |
| - German                                           | 9                                                          | 1.9      | 0.9 - 3.7    | 4                                                       | 1.5      | 0.4 - 3.7    |
| - Italian                                          | 2                                                          | 0.4      | 0.1 - 1.5    | 6                                                       | 2.2      | 0.8 - 4.7    |
| - Other                                            | 20                                                         | 4.3      | 2.7 - 6.6    | 10                                                      | 3.7      | 1.8 - 6.7    |
| <b>Working hours per week</b>                      |                                                            |          |              |                                                         |          |              |
| - Less than 40 hours a week                        | 272                                                        | 58.6     | 54.0 - 63.1  | 147                                                     | 54.0     | 47.9 - 60.1  |
| - 40 hours a week                                  | 69                                                         | 14.9     | 11.8 - 18.4  | 41                                                      | 15.1     | 11.0 - 19.9  |
| - More than 40 hours a week                        | 123                                                        | 26.5     | 22.5 - 30.8  | 84                                                      | 30.9     | 25.4 - 36.7  |
| <b>Family income per year (CHF - Swiss francs)</b> |                                                            |          |              |                                                         |          |              |
| - Less than 90.000 CHF                             | 129                                                        | 27.8     | 23.8 - 32.1  | 87                                                      | 32.0     | 26.5 - 37.9  |
| - Around 90.000 CHF                                | 39                                                         | 8.4      | 6.0 - 11.3   | 32                                                      | 11.8     | 8.2 - 16.2   |
| - More than 90.000 CHF                             | 286                                                        | 61.6     | 57.0 - 66.1  | 149                                                     | 54.8     | 48.7 - 60.8  |
| - Unknown                                          | 10                                                         | 2.2      | 1.0 - 3.9    | 4                                                       | 1.5      | 0.4 - 3.7    |
| <b>Higher educational level</b>                    |                                                            |          |              |                                                         |          |              |
| - No scholar education                             | 1                                                          | 0.2      | 0.0 - 1.2    | 3                                                       | 1.1      | 0.2 - 3.2    |
| - Secondary school 12-15 years old                 | 15                                                         | 3.2      | 1.8 - 5.3    | 4                                                       | 1.5      | 0.4 - 3.7    |
| - Secondary school 15-18 years old                 | 10                                                         | 2.2      | 1.0 - 3.9    | 6                                                       | 2.2      | 0.8 - 4.7    |
| - Diploma                                          | 70                                                         | 15.1     | 12.0 - 18.7  | 50                                                      | 18.4     | 14.0 - 23.5  |
| - Bachelor degree                                  | 105                                                        | 22.6     | 18.9 - 26.7  | 62                                                      | 22.8     | 17.9 - 28.2  |
| - Master degree                                    | 201                                                        | 43.3     | 38.8 - 48.0  | 111                                                     | 40.8     | 34.9 - 46.9  |
| - Doctorate degree / PhD                           | 60                                                         | 12.9     | 10.0 - 16.3  | 35                                                      | 12.9     | 9.1 - 17.4   |
| - Unknown                                          | 2                                                          | 0.4      | 0.1 - 1.5    | 1                                                       | 0.4      | 0.0 - 2.0    |
